# Supplementary material
Source: bioRxiv or medRxiv preprint supplement (https://www.biorxiv.org/highwire/filestream/115769/field_highwire_adjunct_files/2/381525-3.pdf)
Supplement: Supplementary file [file 381525-3.pdf]

|        |           |                                               |            |            |            |            |       |       |
|--------|-----------|-----------------------------------------------|------------|------------|------------|------------|-------|-------|
| Q9NQC3 | RTN4      | Reticulon-4 OS                                | 0.94439655 | 0.82893443 | 0.35362272 | 0.07798621 | FALSE | TRUE  |
| P40926 | MDH2      | Malate dehydrogenase, mitochondrial           | 0.83646419 | 0.73865445 | 0.3553512  | 0.07819778 | FALSE | FALSE |
| O75396 | SEC22B    | Vesicle-trafficking protein SEC22b OS         | 0.62304186 | 0.5644728  | 0.36272283 | 0.07964756 | FALSE | TRUE  |
| Q96AE4 | FUBP1     | Far upstream element-binding protein          | 0.40399437 | 0.37583623 | 0.37041994 | 0.08098787 | FALSE | FALSE |
| P22314 | UBA1      | Ubiquitin-like modifier-activating enzyme     | 0.916668   | 0.86921586 | 0.3760218  | 0.08186056 | FALSE | FALSE |
| Q92820 | GGH       | Gamma-glutamyl hydrolase OS                   | 0.61737048 | 0.58547293 | 0.37605258 | 0.08169233 | FALSE | FALSE |
| Q985J8 | ESYT1     | Extended synaptotagmin-1 OS                   | 0.72027244 | 0.69793031 | 0.38242101 | 0.08272227 | FALSE | FALSE |
| P42167 | TMPO      | Lamina-associated polypeptide 2, isoform 1    | 0.64733392 | 0.62895382 | 0.3832246  | 0.0827201  | FALSE | TRUE  |
| P01617 |           | Ig kappa chain V-II region TEW OS             | 1.03799457 | 1.0180187  | 0.386014   | 0.08314567 | FALSE | FALSE |
| P62805 | HIST1H4A  | Histone H4 OS                                 | 0.33298705 | 0.53638417 | 0.39475475 | 0.08484862 | FALSE | FALSE |
| P19012 | KRT15     | Keratin, type I cytoskeletal 15 OS            | -0.3840047 | 0.38845082 | 0.39528788 | 0.08478397 | FALSE | FALSE |
| P08559 | PDHA1     | Pyruvate dehydrogenase E1 component           | 0.38113087 | 0.40555743 | 0.41065243 | 0.08789403 | FALSE | FALSE |
| P11177 | PDHB      | Pyruvate dehydrogenase E1 component           | 0.71886461 | 0.77083047 | 0.41300255 | 0.08821133 | FALSE | FALSE |
| Q96KA5 | CLPTM1L   | Cleft lip and palate transmembrane protein    | 0.29015947 | 0.31129815 | 0.41316348 | 0.0880607  | FALSE | FALSE |
| P12036 | NEFH      | Neurofilament heavy polypeptide OS            | 1.00305689 | 1.12631246 | 0.42721595 | 0.09086532 | FALSE | FALSE |
| P13646 | KRT13     | Keratin, type I cytoskeletal 13 OS            | 0.57066788 | 1.0656316  | 0.45156197 | 0.09584301 | FALSE | FALSE |
| Q8N1N4 | KRT78     | Keratin, type II cytoskeletal 78 OS           | 0.56568721 | 1.05836265 | 0.45229874 | 0.09579939 | FALSE | FALSE |
| Q15435 | PPP1R7    | Protein phosphatase 1 regulatory subunit      | 0.35304492 | 0.43189515 | 0.45401035 | 0.09596199 | FALSE | FALSE |
| Q86Y46 | KRT73     | Keratin, type II cytoskeletal 73 OS           | 0.58242995 | 1.09967846 | 0.45579647 | 0.09613964 | FALSE | FALSE |
| Q723Y8 | KRT27     | Keratin, type I cytoskeletal 27 OS            | 1.12799099 | 1.3883911  | 0.45593891 | 0.09597058 | FALSE | FALSE |
| Q9V5M8 | SRPRB     | Signal recognition particle receptor subunit  | 0.46277054 | 0.57076283 | 0.45658056 | 0.09570933 | FALSE | TRUE  |
| Q5D862 | FLG2      | Filaggrin-2 OS                                | 0.53161282 | 1.00720414 | 0.45711919 | 0.09562507 | FALSE | FALSE |
| P61019 | RAB2A     | Ras-related protein Rab-2A OS                 | 0.41635088 | 0.51740772 | 0.45896597 | 0.09581425 | FALSE | TRUE  |
| P12273 | PIP       | Prolactin-inducible protein OS                | 1.1527707  | 1.43975286 | 0.4605449  | 0.09594685 | FALSE | FALSE |
| P40925 | MDH1      | Malate dehydrogenase, cytoplasmic OS          | 0.64034057 | 0.82457578 | 0.47021642 | 0.09776142 | FALSE | FALSE |
| P41091 | EIF2S3    | Eukaryotic translation initiation factor 2    | 0.17978953 | 0.24018095 | 0.48187636 | 0.09998115 | FALSE | FALSE |
| P20042 | EIF2S2    | Eukaryotic translation initiation factor 2    | 0.1993072  | 0.4076507  | 0.48626264 | 0.10068575 | FALSE | FALSE |
| P02538 | KRT6A     | Keratin, type II cytoskeletal 6A OS           | 0.46081475 | 0.97566393 | 0.49928109 | 0.10317123 | FALSE | FALSE |
| P43307 | SSR1      | Translocin-associated protein subunit 1       | 0.22162958 | 0.47022191 | 0.50005947 | 0.10312247 | FALSE | TRUE  |
| P35908 | KRT2      | Keratin, type II cytoskeletal 2 epidermal     | 0.53605006 | 1.14086487 | 0.50122787 | 0.10315418 | FALSE | TRUE  |
| Q04837 | SSBP1     | Single-stranded DNA-binding protein, non      | 0.22792356 | 0.48530566 | 0.50139806 | 0.10298075 | FALSE | FALSE |
| O15371 | EIF3D     | Eukaryotic translation initiation factor 3    | 0.13210835 | 0.1973531  | 0.51743417 | 0.1060601  | FALSE | FALSE |
| Q2M2I5 | KRT24     | Keratin, type I cytoskeletal 24 OS            | 0.91951548 | 1.3952735  | 0.52239855 | 0.10664763 | FALSE | FALSE |
| P30086 | PEBP1     | Phosphatidylethanolamine-binding protein      | 0.63591459 | 0.96927343 | 0.52382197 | 0.10672392 | FALSE | FALSE |
| P07339 | CTSD      | Cathepsin D OS                                | 0.32393496 | 0.50777098 | 0.53270093 | 0.10831586 | FALSE | FALSE |
| P13647 | KRT5      | Keratin, type II cytoskeletal 5 OS            | 0.45470063 | 1.06628034 | 0.53706022 | 0.10898428 | FALSE | FALSE |
| O95678 | KRT75     | Keratin, type II cytoskeletal 75 OS           | 0.44560265 | 1.04949425 | 0.53863891 | 0.1090869  | FALSE | FALSE |
| P05455 | SSB       | Lupus La protein OS                           | 0.15057979 | 0.35586646 | 0.53988248 | 0.10912138 | FALSE | FALSE |
| P04259 | KRT6B     | Keratin, type II cytoskeletal 6B OS           | 0.45263455 | 1.07130949 | 0.54042258 | 0.10901381 | FALSE | FALSE |
| Q08188 | TGM3      | Protein-glutamine gamma-glutamyltransferase   | 0.58121155 | 0.93803517 | 0.54192667 | 0.10910075 | FALSE | FALSE |
| P13645 | KRT10     | Keratin, type I cytoskeletal 10 OS            | 0.53270165 | 1.2868408  | 0.54780122 | 0.11006546 | FALSE | FALSE |
| Q00341 | HDLBP     | Vigilin OS                                    | 0.24113987 | 0.41831759 | 0.56457994 | 0.11321294 | FALSE | FALSE |
| P12035 | KRT3      | Keratin, type II cytoskeletal 3 OS            | 0.41580922 | 1.06728989 | 0.56935868 | 0.11394645 | FALSE | FALSE |
| P25311 | AZGP1     | Zinc-alpha-2-glycoprotein OS                  | 0.83863508 | 1.4785743  | 0.56962052 | 0.11377489 | FALSE | FALSE |
| Q96I24 | FUBP3     | Far upstream element-binding protein 3        | 0.28174428 | 0.49780666 | 0.57028967 | 0.1136852  | FALSE | FALSE |
| Q02413 | DSG1      | Desmoglein-1 OS                               | 0.47884854 | 0.91360472 | 0.59392146 | 0.11816441 | FALSE | FALSE |
| Q02543 | RPL18A    | 60S ribosomal protein L18a OS                 | 0.13026085 | 0.36747068 | 0.60176424 | 0.11949095 | FALSE | FALSE |
| P05198 | EIF2S1    | Eukaryotic translation initiation factor 2    | 0.17834726 | 0.51796941 | 0.61143308 | 0.1211742  | FALSE | FALSE |
| P01040 | CSTA      | Cystatin-A OS                                 | 0.66433402 | 1.3786548  | 0.61918658 | 0.12223424 | FALSE | FALSE |
| Q14CN4 | KRT72     | Keratin, type II cytoskeletal 72 OS           | 0.38746138 | 1.18201135 | 0.62743413 | 0.12362236 | FALSE | FALSE |
| O75533 | SF3B1     | Splicing factor 3B subunit 1 OS               | -0.234346  | 0.54325551 | 0.6512727  | 0.12807103 | FALSE | FALSE |
| Q04695 | KRT17     | Keratin, type I cytoskeletal 17 OS            | 0.37018575 | 1.25805289 | 0.66096011 | 0.12972512 | FALSE | FALSE |
| P14923 | JUP       | Junction plakoglobin OS                       | 0.48677162 | 1.17524688 | 0.66267142 | 0.12981039 | FALSE | FALSE |
| P08779 | KRT16     | Keratin, type I cytoskeletal 16 OS            | 0.35320522 | 1.21289947 | 0.66407142 | 0.12983448 | FALSE | FALSE |
| P0C0S8 | HIST1H2AG | Histone H2A type 1 OS                         | 0.11442735 | 0.27780319 | 0.66420588 | 0.12961151 | FALSE | FALSE |
| P02533 | KRT14     | Keratin, type I cytoskeletal 14 OS            | 0.35803274 | 1.23817473 | 0.66616737 | 0.12974524 | FALSE | FALSE |
| P29508 | SERPINB3  | Serpin B3 OS                                  | 0.39471516 | 1.0504961  | 0.68905292 | 0.13394592 | FALSE | FALSE |
| Q72794 | KRT77     | Keratin, type II cytoskeletal 1b OS           | 0.2918461  | 1.180661   | 0.71024435 | 0.13753938 | FALSE | FALSE |
| O00461 | GOLIM4    | Golgi integral membrane protein 4 OS          | 0.19820272 | 0.57493666 | 0.71121343 | 0.13746521 | FALSE | TRUE  |
| P05787 | KRT8      | Keratin, type II cytoskeletal 8 OS            | 0.27806527 | 1.13415246 | 0.71240941 | 0.13743509 | FALSE | FALSE |
| Q8NC51 | SERBP1    | Plasminogen activator inhibitor 1 RNA-binding | 0.14301408 | 0.8521445  | 0.79886219 | 0.15378281 | FALSE | FALSE |
| P05089 | ARG1      | Arginase-1 OS                                 | 0.11392656 | 0.49451054 | 0.79948746 | 0.15365071 | FALSE | FALSE |
| P04264 | KRT1      | Keratin, type II cytoskeletal 1 OS            | 0.17133492 | 1.45645882 | 0.85739594 | 0.16446903 | FALSE | FALSE |
| P46777 | RPL5      | 60S ribosomal protein L5 OS                   | 0.04302154 | 0.29839649 | 0.87195143 | 0.16694613 | FALSE | FALSE |
| Q86Y23 | HRNR      | Hornerin OS                                   | -0.1139447 | 1.16956019 | 0.88151936 | 0.16846078 | FALSE | FALSE |
| P82970 | HMGN5     | High mobility group nucleosome-binding        | 0.04802358 | 0.64969181 | 0.90983867 | 0.17354646 | FALSE | FALSE |
| Q9V6E2 | BZW2      | Basic leucine zipper and W2 domain-containing | 0.01202817 | 0.57536511 | 0.98118411 | 0.18680472 | FALSE | FALSE |
| P35527 | KRT9      | Keratin, type I cytoskeletal 9 OS             | 0.01496801 | 1.56237242 | 0.98826737 | 0.18780159 | FALSE | FALSE |
